# Supplementary material for: Safety and Efficacy of Durvalumab and Tremelimumab Alone or in Combination in Patients with Advanced Gastric and Gastroesophageal Junction Adenocarcinoma
Source: Oxford University Press journal article supplement (doi:10.1158/1078-0432.ccr-19-2443), 2019-11-01
Supplement: 10780432ccr192443-sup-226308_2_supp_5837624_pzf42d.docx [file 10780432ccr192443-sup-226308_2_supp_5837624_pzf42d.docx]

**Supplementary Table S1.** Clinical activity for phase 1b cohort

| **Parameter** | **Phase 1b**  **2L+ D20+T1**  **(*n* = 6)** |
| --- | --- |
| ORR, *n* (%)  Complete response  Partial response  Stable disease  Progressive disease  Non-evaluable  Ongoing response rate | 0  0  0  2 (33.3)  3 (50.0)  1 (16.7)  NA |
| DCR, *n* (%) [95% CI] | 2 (33.3) [4.3–77.7] |
| DCR24, *n* (%) [95% CI] | 1 (16.7) [0.4–64.1] |
| Median time to response, weeks | NA |
| Median duration of response, weeks | NA |

2L+ = received treatment in the second-line (or greater) setting; D = durvalumab; DCR = disease control rate (complete response + partial response + stable disease); DCR24, DCR at 24 weeks (complete response + partial response + stable disease ≥24 weeks); NA = not applicable; ORR = objective response rate; T = tremelimumab.
